# Supplementary material for: Formation of a giant unilocular vacuole via macropinocytosis-like process confers anoikis resistance
Source: eLife journal article supplement (doi:10.7554/elife.96178), 2024-04-16

1/28 Sample Figure 5-figure supplement 1

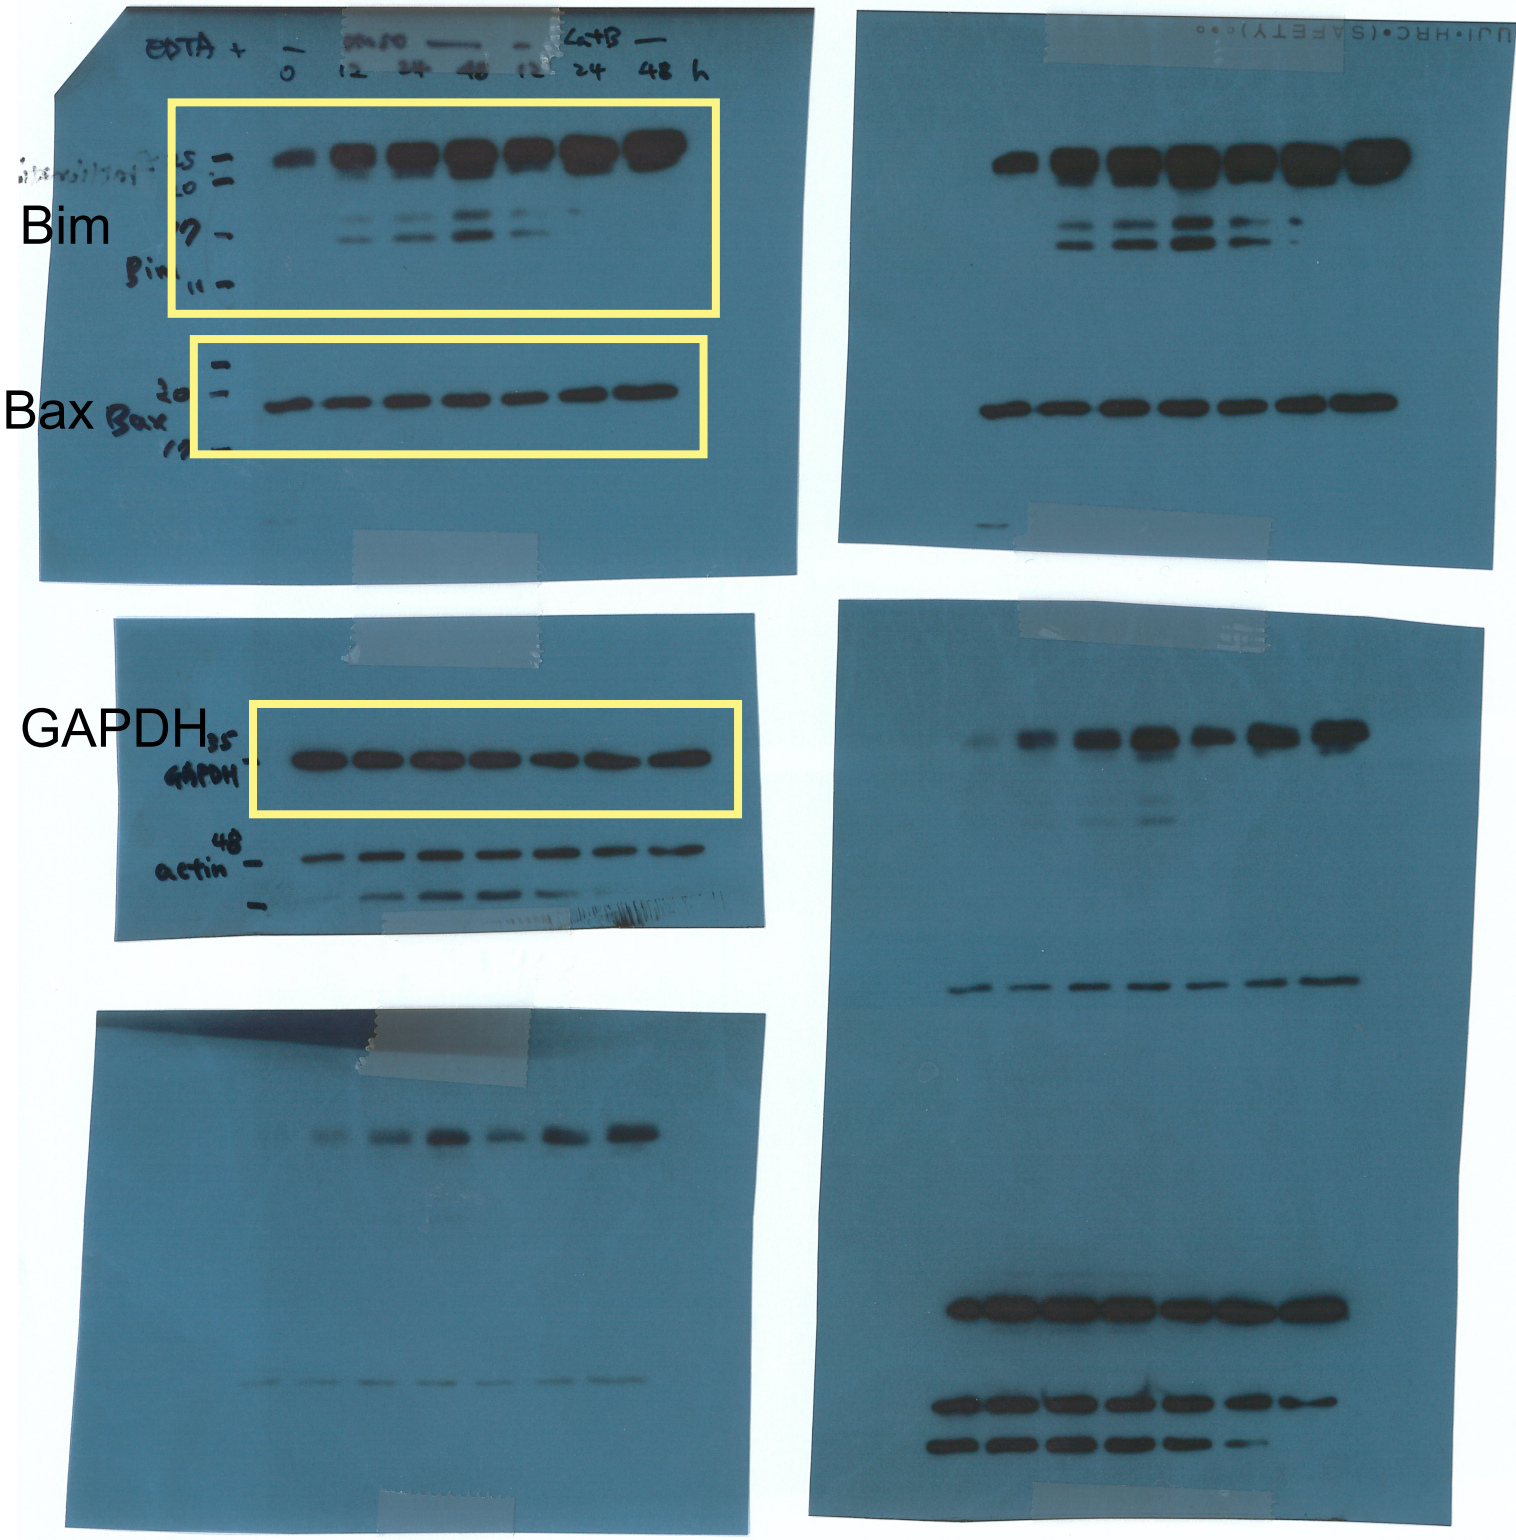



## Figure 5-figure supplement 1

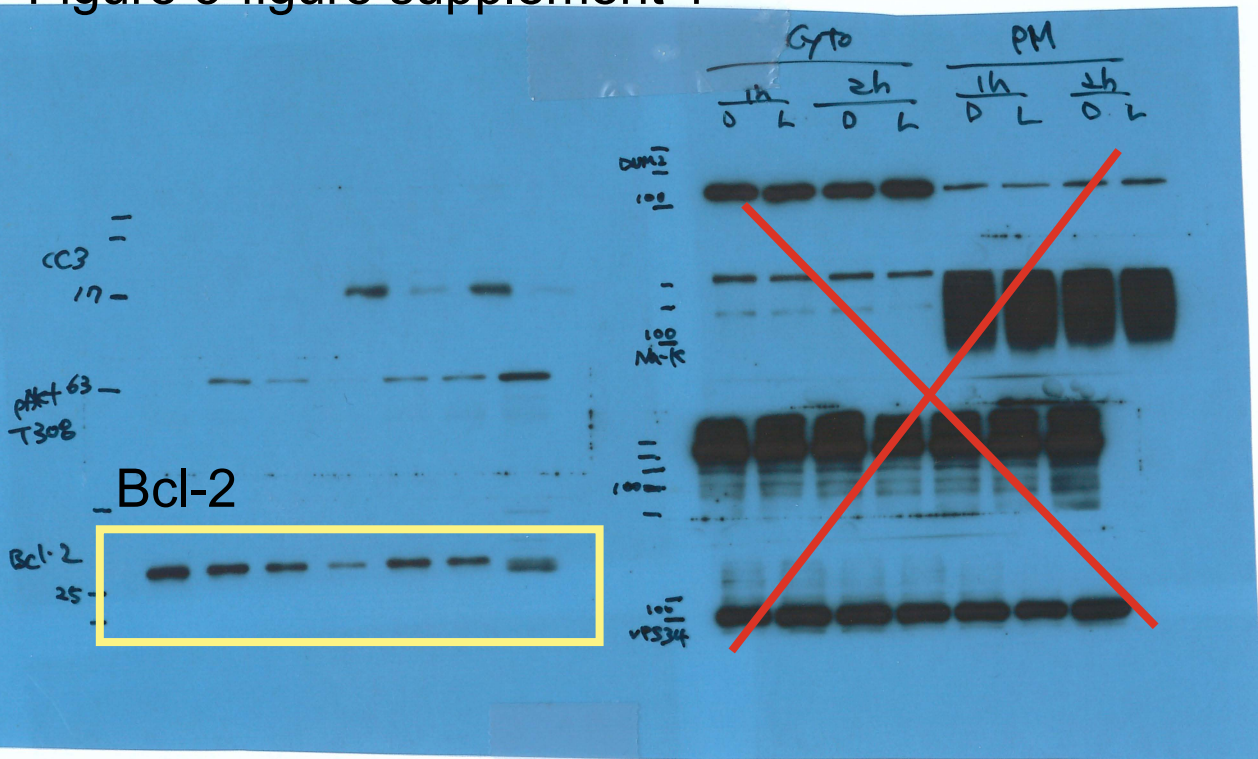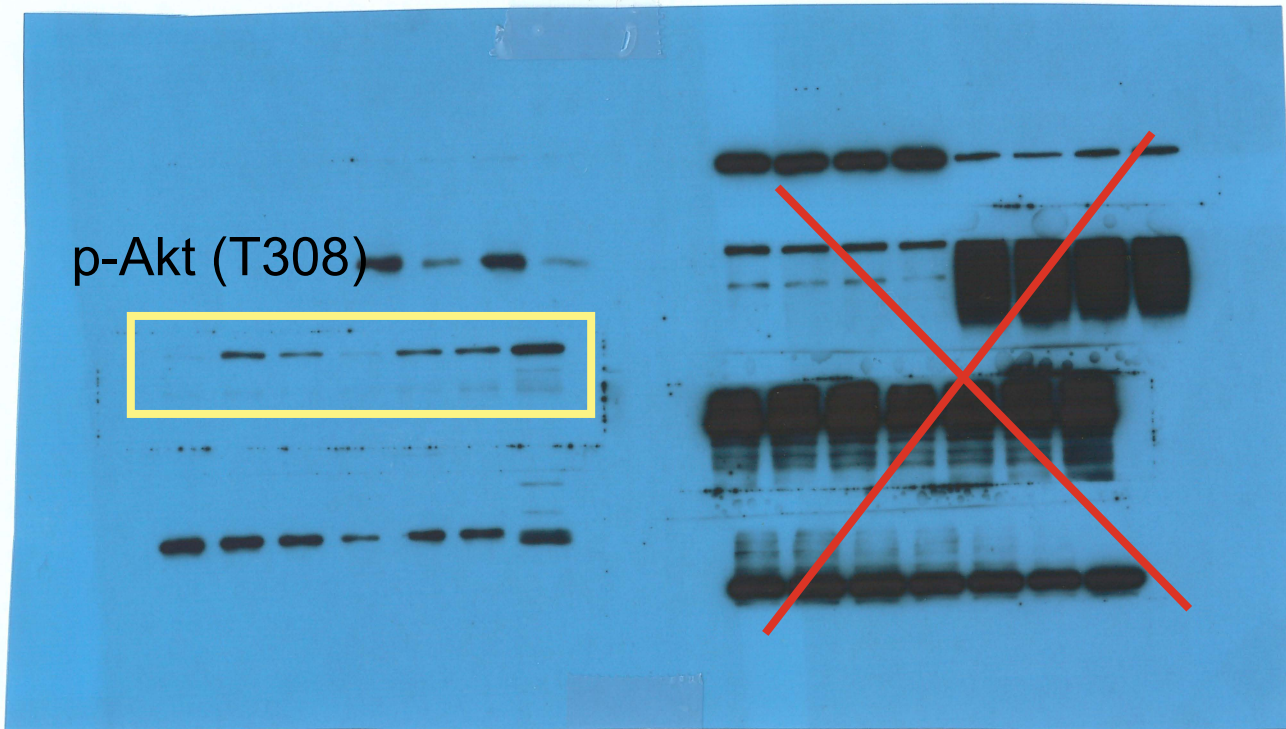

# Figure 5-figure supplement 1

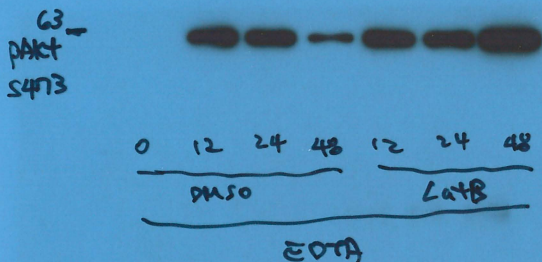

pAkt  
S473

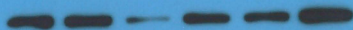

p-Akt (S473)

pAkt  
S473

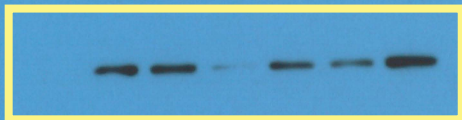

Supplement: fig5-figsupp1-data1 [file elife-96178-fig5-figsupp1-data1-v1.zip]
