# Supplementary material for: Formation of a giant unilocular vacuole via macropinocytosis-like process confers anoikis resistance
Source: eLife. 2024 Nov 7;13:RP96178. doi: 10.7554/eLife.96178 (PMC11542918; doi:10.7554/eLife.96178)
Supplement: Figure 1—figure supplement 1—source data 1. [file elife-96178-fig1-figsupp1-data1.xlsx]

## Sheet: Sheet1
Figure 1-supplement 1 (D)
Lat.B susp 18hr + 2.5%Matrigel
1st	% of large vacuole	=100*(Vac/Hoescht)
	0hr	0	=100*(0/164)
	18hr+Lat.B	36	=100*(45/125)			total number of cells
	18hr+Lat.B+2.5% Matrigel	7.69231	=100*(9/117)		Mock	523
					Lat.B	571
2nd	% of large vacuole	=100*(Vac/Hoescht)			Lat.B+Matrigel	587
	0hr	1.82927	=100*(3/164)
	18hr+Lat.B	43.8017	=100*(106/242)
	18hr+Lat.B+2.5% Matrigel	19.4215	=100*(47/242)
3th	% of large vacuole	=100*(Vac/Hoescht)
	0hr	4.10256	=100*(8/195)
	18hr+Lat.B	47.0588	=100*(96/204)
	18hr+Lat.B+2.5% Matrigel	13.5965	=100*(31/228)
