# Supplementary material for: Formation of a giant unilocular vacuole via macropinocytosis-like process confers anoikis resistance
Source: eLife. 2024 Nov 7;13:RP96178. doi: 10.7554/eLife.96178 (PMC11542918; doi:10.7554/eLife.96178)
Supplement: Figure 1—source data 1. [file elife-96178-fig1-data1.xlsx]

## Sheet: Sheet1
Figure 1 (B)
susp 24hr
	Entosis	GUVac	Hoechst
1st	14	0	40		total number of cells
	10	1	36		772
	16	4	51
	27	0	59
	37	2	68
	104	7	254
	40.9449	2.75591
2nd	41	1	73
	10	0	36
	42	0	91
	30	2	59
	8	2	18
	131	5	277
	47.2924	1.80505
3rd	Entosis	GUVac	Hoechst
	19	0	35
	19	1	38
	12	1	39
	31	1	86
	22	3	43
	103	6	241
	42.7386	2.48963
