# Supplementary material for: Formation of a giant unilocular vacuole via macropinocytosis-like process confers anoikis resistance
Source: eLife. 2024 Nov 7;13:RP96178. doi: 10.7554/eLife.96178 (PMC11542918; doi:10.7554/eLife.96178)
Supplement: Figure 1—source data 2. [file elife-96178-fig1-data2.xlsx]

## Sheet: Sheet1
Figure 1 (E)
HMEpiC vacuole
1st			Vacuoles	Hoechst	2nd			Vacuoles	Hoechst	3rd			Vacuoles	Hoechst
	DMSO	0hr	0	56		DMSO	0hr	0	58		DMSO	6hr	0	27
			0	61				0	71				0	34
			0	56				0	50				0	22
			0	75				0	57				0	23
			0	55				0	67				0	26
		6hr	0	33			6hr	0	42			12hr	0	52
			0	30				0	41				0	26
			0	40				0	39				0	43
			0	39				0	40				0	38
			0	44				0	56
			0	50				0	51		LatB	6hr	0	35
			0	47				0	38				0	26
		12hr	0	33			12hr	0	38				0	32
			0	39				0	45				0	30
			0	28				0	30				0	23
			0	27				0	48			12hr	2	33
			0	34				0	30				2	23
			0	15				0	40				1	38
			0	40				0	41				4	43
	LatB	6hr	0	5		LatB	6hr	0	23
			0	22				0	50
			0	8				0	28
			0	19				0	37
			0	20				1	15
			0	16				0	28
			0	5				0	20
			0	28				0	27
			1	23				0	28
			0	20				0	34
			0	14				0	30
			1	37				0	25
			1	30				1	32
			0	20				0	33
			1	29				0	35
			0	40				0	40
			0	26				0	12
			0	20				0	11
			1	34				0	19
		12hr	2	29				2	30
			2	21				0	9
			4	31				0	19
			5	22				5	20
			1	33				2	9
			4	23				0	15
			3	28				1	11
			5	22				6	16
			2	25				1	7
			4	28			12hr	0	31
			2	29				1	37
			3	29				3	42
			2	33				3	33
			3	18				3	35
			1	27				4	25
			6	30				4	22
			3	32				0	32
			9	38				4	29
			1	20				3	22
			1	28				4	36
			1	25				5	36
			2	29				5	25
			4	36				9	33
			3	24				8	13
		24hr	11	24				3	22
			10	24				6	26
			10	28				3	41
			6	15				5	36
			7	19				3	32
			9	21				6	38
			9	33				6	23
			6	33				5	12
			7	24				7	27
			9	26			24hr	11	25
			7	26				12	27
			12	35				10	20
			9	18				12	25
			9	22				8	37
			14	32				6	37
			11	31				5	30
			5	25				7	15
			6	27				11	36
								11	32
								6	34
								7	34
								12	33
								12	25
								7	17
								6	15
								7	20
