# Supplementary material for: Formation of a giant unilocular vacuole via macropinocytosis-like process confers anoikis resistance
Source: eLife. 2024 Nov 7;13:RP96178. doi: 10.7554/eLife.96178 (PMC11542918; doi:10.7554/eLife.96178)
Supplement: Figure 1—source data 3. [file elife-96178-fig1-data3.xlsx]

## Sheet: Sheet1
Figure 1 (F)
susp 24hr
	DMSO_1		DMSO_2		DMSO_3		Blebbistatin_1		Blebbistatin_2		Blebbistatin_3			Total number of cells
	Hoechst	Vac	Hoechst	Vac	Hoechst	Vac	Hoechst	Vac	Hoechst	Vac	Hoechst	Vac	DMSO	1087
	75	0	57	0	95	1	34	0	35	0	35	0	Blebbistatin	520
	116	1	83	1	105	1	42	0	56	0	38	0	Lat.B	1634
	51	0	82	0	134	0	27	0	55	0	24	0	Nocodazole	1342
	76	1	133	1	80	1	49	0	44	0	38	0	Rho i	839
sum	318	2	355	2	414	3	152	0	190	0	43	0	Y-27632	1322
% vac		0.628931		0.56338		0.724638					178	0	EHT 1864	905
													ML-141	997
													Jasplakinolide	2578
	Lat.B_1		Lat.B_2		Lat.B_3		Nocodazole_1		Nocodazole_2		Nocodazole_3
	Hoechst	Vac	Hoechst	Vac	Hoechst	Vac	Hoechst	Vac	Hoechst	Vac	Hoechst	Vac
	189	28	91	12	66	14	55	2	52	1	70	3
	116	25	109	20	99	16	67	1	61	2	73	1
	194	27	112	20	73	24	68	3	47	1	56	1
	94	30	118	27	104	37	110	0	54	3	83	1
	63	20	127	36	79	28	92	2	73	2	93	2
sum	656	130	557	115	421	119	86	3	111	1	91	1
% vac		19.8171		20.6463		28.266	478	11	398	10	466	9
								2.30126		2.51256		1.93133
	Rho inhibitor_1		Rho inhibitor_2		Rho inhibitor_3		Y-27632_1		Y-27632_2		Y-27632_3
	Hoechst	Vac	Hoechst	Vac	Hoechst	Vac	Hoechst	Vac	Hoechst	Vac	Hoechst	Vac
	87	2	73	0	69	0	96	0	129	1	89	0
	35	1	92	2	66	0	130	0	104	0	81	0
	63	0	85	0	74	1	119	0	96	0	53	1
	37	0	78	0	80	0	143	1	159	0	123	0
sum	222	3	328	2	289	1	488	1	488	1	346	1
% vac		1.35135		0.609756		0.346021		0.204918		0.204918		0.289017
	EHT 1864_1		EHT 1864_2		EHT 1864_3		ML-141_1		ML-141_2		ML-141_3
	Hoechst	Vac	Hoechst	Vac	Hoechst	Vac	Hoechst	Vac	Hoechst	Vac	Hoechst	Vac
	72	4	67	2	57	0	124	0	85	1	75	0
	66	1	95	1	86	1	106	1	78	0	66	1
	83	1	86	1	84	1	109	2	61	3	73	0
	51	1	61	0	97	2	88	4	71	2	61	1
sum	272	7	309	4	324	4	427	7	295	6	275	2
% vac		2.57353		1.2945		1.23457		1.63934		2.0339		0.727273
	Jasplakinolide 100nM_1		Jasplakinolide 100nM_2		Jasplakinolide 100nM_3
	Hoechst	Vac	Hoechst	Vac	Hoechst	Vac
	398	2	384	4	487	2
	488	2	408	3	413	1
sum	886	4	792	7	900	3
% vac		0.451467		0.883838		0.333333
