# Supplementary material for: Formation of a giant unilocular vacuole via macropinocytosis-like process confers anoikis resistance
Source: eLife. 2024 Nov 7;13:RP96178. doi: 10.7554/eLife.96178 (PMC11542918; doi:10.7554/eLife.96178)
Supplement: Figure 1—source data 4. [file elife-96178-fig1-data4.xlsx]

## Sheet: Sheet1
Figure 1 (H)
SpvB vacuole
1st	Sample	Images	# of total cells	# of vacuoles
	CTL	2	67	2
		4	94	4
			161	6	3.72671
	CTL+Lat	1	143	88
		4	182	93
			325	181	55.6923
	SpvB	1	34	16
		2	22	12
		3	22	11
		4	19	7
		5	30	12
			127	58	45.6693
2nd	Sample	Images	# of total cells	# of vacuoles
	CTL	3	23	2
		4	24	0
		5	18	0
		6	14	0
		7	10	0
			89	2	2.24719
	CTL+Lat	2	60	32
		3	36	20
		4	21	13
		5	54	30
		6	41	20
		7	40	20
			252	135	53.5714
	SpvB	6'	52	28
		7	45	22
		8	63	35
		9	39	18
		10	34	12
		11	39	20
		4	29	12
			301	147	48.8372
3rd	Sample	Images	# of total cells	# of vacuoles
	CTL	1	42	4
		2	28	0
		3	48	4
		5	46	0
			164	8	4.87805
	CTL+Lat	1	108	48
		2	92	41
		3	88	39
		4	97	42
		5	167	80
			552	250	45.2899
	SpvB	1	24	10
		3	97	33
		4	104	35
		5	87	34
		6	35	22
			347	134	38.6167
