# Supplementary material for: Formation of a giant unilocular vacuole via macropinocytosis-like process confers anoikis resistance
Source: eLife. 2024 Nov 7;13:RP96178. doi: 10.7554/eLife.96178 (PMC11542918; doi:10.7554/eLife.96178)
Supplement: Figure 2—source data 3. [file elife-96178-fig2-data3.xlsx]

## Sheet: Sheet1
Figure 2 (F)
Lat.B susp 18hr + 1hr FITC dxt 70kda, 10kda
1st	% of highly enriched fluorescent cells	=100*(brighted FITC/Hoescht)			total number of cells
	Mock-70Kda	0.754717	=100*(2/265)	Mock-70kDa	797
	Lat.B-70Kda	9.80392	=100*(45/459)	Lat.B-70kDa	1534
	Lat.B+EIPA-70kda	1	=100*(2/200)	Lat.B+EIPA-70kDa	821
	Mock-10Kda	0.343643	=100*(1/291)
	Lat.B-10Kda	9.72973	=100*(36/370)
	Lat.B+EIPA-10kda	0.760456	=100*(2/263)
2nd	% of highly enriched fluorescent cells	=100*(brighted FITC/Hoescht)
	Mock-70Kda	0.913242	=100*(2/219)
	Lat.B-70Kda	13.1944	=100*(76/576)
	Lat.B+EIPA-70kda	1.09091	=100*(3/275)
	Mock-10Kda	0	=100*(0/215)
	Lat.B-10Kda	9.48905	=100*(52/548)
	Lat.B+EIPA-10kda	2.43902	=100*(7/287)
3th	% of highly enriched fluorescent cells	=100*(brighted FITC/Hoescht)
	Mock-70Kda	0.319489	=100*(1/313)
	Lat.B-70Kda	12.8257	=100*(64/499)
	Lat.B+EIPA-70kda	1.15607	=100*(4/346)
	Mock-10Kda	1.46628	=100*(5/341)
	Lat.B-10Kda	8.84774	=100*(43/486)
	Lat.B+EIPA-10kda	0.27933	=100*(1/358)
