# Supplementary material for: Formation of a giant unilocular vacuole via macropinocytosis-like process confers anoikis resistance
Source: eLife. 2024 Nov 7;13:RP96178. doi: 10.7554/eLife.96178 (PMC11542918; doi:10.7554/eLife.96178)
Supplement: Figure 3—source data 1. [file elife-96178-fig3-data1.xlsx]

## Sheet: Sheet1
Figure 3 (B)
Assembled septin 6 counting
DMSO_6h			LatB_6h			LatB FCF_6h
	Image #	Count		Image #	Count		Image #	Count
1st	1	27	1st	1	67	1st	1	41
	2	10		2	53		2	27
	3	42		3	54		3	28
	4	9		4	102		4	32
	5	28		5	62		5	15
	6	17		6	48		6	31
	7	24		7	65		7	28
	8	38		8	40		8	43
	9	35		9	58		9	31
	10	36		10	73		10	19
2nd	1	40		11	53		11	39
	2	16		12	62		12	25
	3	29		13	50		13	21
	4	39		14	35		14	28
	5	32		15	39		15	17
	6	31		16	65		16	32
	7	28		17	60	2nd	1	21
	8	41		18	34		2	27
	9	30		19	67		3	19
	10	30		20	68		4	30
	11	18		21	44		5	18
	12	22		22	77		6	22
	13	50	2nd	1	61		7	25
	14	22		2	34		8	31
				3	53		9	19
				4	51		10	15
				5	22		11	19
				6	55		12	20
				7	49		13	20
				8	68		14	23
				9	42		15	11
				10	49		16	17
				11	52		17	12
				12	52		18	28
				13	66		19	32
				14	43		20	24
				15	34		21	30
				16	56		22	14
				17	59		23	27
				18	33		24	31
				19	48		25	45
				20	34
				21	38
				22	40
				23	55
				24	36
				25	45
