# Supplementary material for: Formation of a giant unilocular vacuole via macropinocytosis-like process confers anoikis resistance
Source: eLife. 2024 Nov 7;13:RP96178. doi: 10.7554/eLife.96178 (PMC11542918; doi:10.7554/eLife.96178)
Supplement: Figure 3—source data 6. [file elife-96178-fig3-data6.xlsx]

## Sheet: Sheet1
Figure 3 (H)
LatB susp 18hr +/- Dynamin2 inhibitors
1st	% of large vacuole	=100*(Vac/Hoescht)				Total n of cells
	DMSO	3.59435	=100*(28/779)		DMSO	1423
	Lat.B 5uM	52.8986	=100*(219/414)		Lat.B	1151
	Dynasore 100uM +Lat.B	29.1866	=100*(183/627)		Dynasore	1407
	Dynole 34-2 10uM +Lat.B	5.85366	=100*(24/410)		Dynole	947
	OctMAB 20uM +Lat.B	3.4375	=100*(11/320)		OctMAB	699
	MItMAB 10uM +Lat.B	3.82696	=100*(23/601)		MitMAB	1404
2nd	% of large vacuole	=100*(Vac/Hoescht)
	DMSO	2.33766	=100*(9/385)
	Lat.B 5uM	52.452	=100*(246/469)
	Dynasore 100uM +Lat.B	23.4257	=100*(93/397)
	Dynole 34-2 10uM +Lat.B	2.57069	=100*(10/389)
	OctMAB 20uM +Lat.B	3.07692	=100*(6/195)
	MItMAB 10uM +Lat.B	6.09756	=100*(25/410)
3rd	% of large vacuole	=100*(Vac/Hoescht)
	DMSO	3.0888	=100*(8/259)
	Lat.B 5uM	42.5373	=100*(114/268)
	Dynasore 100uM +Lat.B	4.17755	=100*(16/383)
	Dynole 34-2 10uM +Lat.B	1.35135	=100*(2/148)
	OctMAB 20uM +Lat.B	0	=100*(0/184)
	MItMAB 10uM +Lat.B	1.27226	=100*(5/393)
