# Supplementary material for: Formation of a giant unilocular vacuole via macropinocytosis-like process confers anoikis resistance
Source: eLife. 2024 Nov 7;13:RP96178. doi: 10.7554/eLife.96178 (PMC11542918; doi:10.7554/eLife.96178)
Supplement: Figure 4—source data 2. [file elife-96178-fig4-data2.xlsx]

## Sheet: Sheet1
Figure 4 (B)
siPI3K susp 24h
	siCon		siPIK3CA		siPIK3CB		siPIK3C2A		siPIK3C3				total number of cells
	GUVac	Total	GUVac	Total	GUVac	Total	GUVac	Total	GUVac	Total		siCon	456
	39	55	63	96	25	57	13	63	4	25		siPIK3CA	718
	49	85	92	151	41	75	5	34	7	38		siPIK3CB	709
	57	102	52	81	53	97	11	49	10	61		siPIK3C2A	421
sum	145	242	207	328	119	229	29	146	21	124		siPIK3C3	295
%	59.9174		63.1098		51.9651		19.863		16.9355
	siCon		siPIK3CA		siPIK3CB		siPIK3C2A		siPIK3C3
	GUVac	Total	GUVac	Total	GUVac	Total	GUVac	Total	GUVac	Total
	20	34	30	38	79	133	11	113	2	28
	17	30	68	95	91	171	7	55	17	88
	36	52	73	123			6	52
sum	73	116	171	256	170	304	24	220	19	116
%	62.931		66.7969		55.9211		10.9091		16.3793
	siCon		siPIK3CA		siPIK3CB		siPIK3C2A		siPIK3C3
	GUVac	Total	GUVac	Total	GUVac	Total	GUVac	Total	GUVac	Total
	24	38	19	34	34	57	8	25	3	28
	16	27	27	46	36	61	10	30	3	27
	23	33	35	54	33	58
sum	63	98	81	134	103	176	18	55	6	55
%	64.2857		60.4478		58.5227		32.7273		10.9091
