# Supplementary material for: Formation of a giant unilocular vacuole via macropinocytosis-like process confers anoikis resistance
Source: eLife. 2024 Nov 7;13:RP96178. doi: 10.7554/eLife.96178 (PMC11542918; doi:10.7554/eLife.96178)
Supplement: Figure 4—source data 3. [file elife-96178-fig4-data3.xlsx]

## Sheet: Sheet1
Figure 4 (F)
Maximum vacuole diameter in VPS34 inhibited cells
1st					2nd					3rd
LatB		Maximum vacuole diameter (um)	average		LatB		Maximum vacuole diameter (um)	average		LatB		Maximum vacuole diameter (um)	average
3h	Cell1	2.139			3h	Cell1	0.759			3h	Cell1	1.388
	Cell2	4.673				Cell2	1.21				Cell2	1.601
	Cell3	2.418				Cell3	1.501				Cell3	0.875
	Cell4	1.935				Cell4	0.713				Cell4	1.935
	Cell5	1.396	2.5122			Cell5	0.648				Cell5	0.988
6h	Cell1	7.667				Cell6	1.177				Cell6	0.552
	Cell2	5.095				Cell7	1.033				Cell7	1.523
	Cell3	3.8				Cell8	1.01				Cell8	1.799
	Cell4	3.073				Cell9	1.238				Cell9	0.815	1.27511
	Cell5	3.121	4.5512			Cell10	1.018			6h	Cell1	2.318
12h	Cell1	3.719				Cell11	2.538				Cell2	2.766
	Cell2	7.291				Cell12	1.517				Cell3	3.517
	Cell3	5.915				Cell13	0.916				Cell4	1.416
	Cell4	5.831				Cell14	2.375				Cell5	3.296
	Cell5	8.582				Cell15	1.511	1.2776			Cell6	2.535
	Cell6	9.329			6h	Cell1	3.321				Cell7	1.357
	Cell7	7.215				Cell2	4.681				Cell8	0.945
	Cell8	5.103				Cell3	4.117				Cell9	2.76
	Cell9	8.418				Cell4	1.685				Cell10	2.943
	Cell10	6.629				Cell5	3.198				Cell11	5.372
	Cell11	7.328	6.85091			Cell6	1.407				Cell12	5.256
LatB+VPS34-IN1						Cell7	3.868				Cell13	3.021
3h	Cell1	1.805				Cell8	2.147				Cell14	1.382
	Cell2	3.398				Cell9	3.183				Cell15	3.54
	Cell3	3.61				Cell10	2.443				Cell16	3.522
	Cell4	1.78				Cell11	4.298				Cell17	2.505
	Cell5	1.131				Cell12	3.08				Cell18	1.723
	Cell6	1.408				Cell13	6.385				Cell19	4.325	2.86837
	Cell7	2.341				Cell14	2.518			12h	Cell1	6.032
	Cell8	4.438				Cell15	3.358	3.3126			Cell2	4.524
	Cell9	2.954			12h	Cell1	7.482				Cell3	3.902
	Cell10	0.858				Cell2	5.341				Cell4	8.749
	Cell11	1.037	2.25091			Cell3	4.092				Cell5	4.947
6h	Cell1	2.533				Cell4	5.963				Cell6	4.417
	Cell2	1.163				Cell5	7.878				Cell7	2.21
	Cell3	1.844				Cell6	5.277				Cell8	3.83
	Cell4	1.474				Cell7	4.729				Cell9	5.363
	Cell5	1.616				Cell8	11.749				Cell10	7.993
	Cell6	2.374				Cell9	6.86				Cell11	4.554
	Cell7	1.274				Cell10	4.619				Cell12	5.614
	Cell8	1.021				Cell11	6.609	6.41809			Cell13	6.184
	Cell9	1.085			LatB+VPS34-IN1						Cell14	2.817	5.08114
	Cell10	1.471	1.5855		3h	Cell1	1.396			LatB+VPS34-IN1
12h	Cell1	2.089				Cell2	1.149			3h	Cell1	0.658
	Cell2	2.805				Cell3	1.6				Cell2	1.64
	Cell3	2.308				Cell4	1.152				Cell3	1.738
	Cell4	2.921				Cell5	1.109				Cell4	1.358
	Cell5	3.534	2.7314			Cell6	3.076				Cell5	1.271
						Cell7	1.461				Cell6	1.026
						Cell8	0.974				Cell7	1.379
						Cell9	1.931				Cell8	1.109
						Cell10	1.951				Cell9	1.214
						Cell11	1.935				Cell10	2.113
						Cell12	0.858				Cell11	3.891
						Cell13	1.165				Cell12	1.269
						Cell14	1.455				Cell13	1.041
						Cell15	1.472				Cell14	1.758	1.53321
						Cell16	0.787			6h	Cell1	2.05
						Cell17	1.047				Cell2	1.593
						Cell18	1.353				Cell3	1.269
						Cell19	1.46				Cell4	1.058
						Cell20	1.076				Cell5	0.667
						Cell21	1.575				Cell6	1.73
						Cell22	0.899	1.40368			Cell7	2.988
					6h	Cell1	1.404				Cell8	0.976	1.54137
						Cell2	2.548			12h	Cell1	2.518
						Cell3	1.922				Cell2	2.173
						Cell4	3.887				Cell3	0.945
						Cell5	1.17				Cell4	1.382
						Cell6	2.302				Cell5	1.935
						Cell7	1.406				Cell6	3.077
						Cell8	2.404				Cell7	3.113
						Cell9	1.44				Cell8	1.429
						Cell10	1.074				Cell9	1.742
						Cell11	1.565				Cell10	1.307
						Cell12	1.96				Cell11	3.205
						Cell13	1.428				Cell12	1.56	2.03217
						Cell14	1.003
						Cell15	1.474
						Cell16	1.085
						Cell17	1.161
						Cell18	1.473
						Cell19	1.041
						Cell20	3.589
						Cell21	1.421
						Cell22	0.741
						Cell23	1.093
						Cell24	1.033
						Cell25	2.991	1.7046
					12h	Cell1	0.814
						Cell2	2.283
						Cell3	0.75
						Cell4	0.639
						Cell5	2.239
						Cell6	1.461
						Cell7	1.428
						Cell8	1.172
						Cell9	1.365
						Cell10	1.773
						Cell11	2.782
						Cell12	1.399
						Cell13	1.968
						Cell14	1.996
						Cell15	2.446
						Cell16	1.251
						Cell17	1.439
						Cell18	0.892
						Cell19	1.516
						Cell20	0.965
						Cell21	1.298
						Cell22	1.665	1.52459
