# Supplementary material for: Formation of a giant unilocular vacuole via macropinocytosis-like process confers anoikis resistance
Source: eLife. 2024 Nov 7;13:RP96178. doi: 10.7554/eLife.96178 (PMC11542918; doi:10.7554/eLife.96178)
Supplement: Figure 5—source data 2. [file elife-96178-fig5-data2.xlsx]

## Sheet: Sheet1
Figure 5 (E) & (F)
Susp+EDTA_24hr/48hr/72hr
	1st
	DMSO_1			DMSO_2			Lat.B_1			Lat.B_2					Total n of cells
	Trypan blue	Vacuole	Total	Trypan blue	Vacuole	Total	Trypan blue	Vacuole	Total	Trypan blue	Vacuole	Total		DMSO 24hr	1003
	2	0	41	3	1	95	1	32	77	7	23	60		DMSO 48hr	797
	5	0	51	4	0	76	5	20	55	3	18	41		DMSO 72hr	943
	2	0	56	3	0	31	3	19	58	6	17	39		Lat.B 24hr	1473
	3	0	43	7	0	64	3	18	49	0	19	44		Lat.B 48hr	2100
	4	1	75	2	0	53	7	21	59	4	18	47		Lat.B 72hr	1350
sum	16	1	266	19	1	319	19	110	298	20	95	231
%	6.01504	0.37594		5.95611	0.31348		6.37584	36.9128		8.65801	41.1255
	2nd
	DMSO_1			DMSO_2			Lat.B_1			Lat.B_2
	Trypan blue	Vacuole	Total	Trypan blue	Vacuole	Total	Trypan blue	Vacuole	Total	Trypan blue	Vacuole	Total
	20	0	38	26	0	38	27	60	100	15	33	59
	15	1	27	31	0	39	25	69	107	19	57	93
	17	0	27	19	0	32	39	43	113	13	49	75
	21	0	26	19	1	33	37	76	133	17	53	84
	22	0	32	26	1	36	22	49	77	18	61	97
	31	0	39	24	0	35	11	37	52	13	35	61
sum	126	1	189	145	2	213	161	334	582	95	288	469
%	66.6667	0.529101		68.0751	0.938967		27.6632	57.3883		20.2559	61.4072
	3rd
	DMSO_1			DMSO_2			Lat.B_1			Lat.B_2
	Trypan blue	Vacuole	Total	Trypan blue	Vacuole	Total	Trypan blue	Vacuole	Total	Trypan blue	Vacuole	Total
	55	0	63	66	0	76	17	22	42	31	26	59
	64	0	73	57	0	68	25	14	43	16	27	50
	74	0	81	44	0	50	18	15	40	29	41	76
	52	1	56	37	0	45	32	25	60	22	20	45
	34	0	38	56	0	61	22	22	47	20	25	50
sum	279	1	311	260	0	300	114	98	232	118	139	280
%	89.7106	0.321543		86.6667	0		49.1379	42.2414		42.1429	49.6429
	220810_Susp+EDTA_24hr
	DMSO_1			DMSO_2			Lat.B_1			Lat.B_2
	Trypan blue	Vacuole	Total	Trypan blue	Vacuole	Total	Trypan blue	Vacuole	Total	Trypan blue	Vacuole	Total
	3	2	22	0	0	13	5	24	44	3	21	38
	1	0	18	0	0	22	3	13	32	7	12	32
	2	0	24	1	0	15	1	14	24	1	14	21
	0	0	29	2	1	23	4	10	21	5	13	25
	0	0	25	2	0	8	4	8	22	5	15	29
	1	0	20	2	0	15	6	10	25	5	10	21
	4	1	15	3	0	9	5	18	28	7	22	41
	2	0	23	3	0	23	6	13	32	4	21	47
	1	1	22	1	1	19	3	15	23	3	15	32
	1	1	22				1	10	21	5	12	24
	0	0	31				2	13	25	3	16	30
	0	2	20				2	13	26	6	17	37
							9	25	62	5	12	30
							2	13	20	1	9	22
							2	17	30	1	14	24
							0	11	25	3	12	31
sum	15	7	271	14	2	147	55	227	460	64	235	484
%	5.53506	2.58303		9.52381	1.36054		11.9565	49.3478		13.2231	48.5537
	220806_Susp+EDTA_48hr
	DMSO_1			DMSO_2			Lat.B_1			Lat.B_2
	Trypan blue	Vacuole	Total	Trypan blue	Vacuole	Total	Trypan blue	Vacuole	Total	Trypan blue	Vacuole	Total
	9	1	17	12	1	18	22	33	70	20	24	54
	11	0	14	8	1	14	26	28	65	9	23	42
	10	0	15	7	0	15	24	28	71	31	19	66
	10	0	17	7	1	11	18	29	55	23	28	65
	14	1	17	11	0	15	16	29	69	32	24	70
	9	1	20	21	0	29	20	29	59	15	20	45
	14	1	19	15	0	19	23	33	70	24	14	47
	12	0	16	9	1	10	13	21	47	20	22	47
	12	0	15	16	0	19	23	22	63	12	18	44
	10	1	14	12	0	16
	13	0	16	12	0	13
	7	0	16	17	0	20
sum	131	5	196	147	4	199	185	252	569	186	192	480
%	66.8367	2.55102		73.8693	2.01005		32.5132	44.2882		38.75	40
	220807_Susp+EDTA_72hr
	DMSO_1			DMSO_2			Lat.B_1			Lat.B_2
	Trypan blue	Vacuole	Total	Trypan blue	Vacuole	Total	Trypan blue	Vacuole	Total	Trypan blue	Vacuole	Total
	14	0	17	13	0	13	14	21	37	15	12	34
	15	0	18	13	0	14	19	23	49	15	25	46
	11	1	14	11	0	11	17	28	51	17	14	33
	8	0	9	12	0	14	17	18	47	13	19	35
	16	0	19	15	0	15	20	16	39	29	17	52
	15	1	19	18	0	21	19	25	51	17	14	34
	14	0	14	16	0	19	19	15	43	18	15	36
	17	0	17	12	0	13	14	14	35	21	14	38
	16	0	19	13	0	16	23	17	43	22	11	34
	17	0	20	10	1	12	22	22	59	23	14	42
				11	0	18
sum	143	2	166	144	1	166	184	199	454	190	155	384
%	86.1446	1.20482		86.747	0.60241		40.5286	43.8326		49.4792	40.3646
