# Supplementary material for: Formation of a giant unilocular vacuole via macropinocytosis-like process confers anoikis resistance
Source: eLife. 2024 Nov 7;13:RP96178. doi: 10.7554/eLife.96178 (PMC11542918; doi:10.7554/eLife.96178)
Supplement: Figure 5—source data 4. [file elife-96178-fig5-data4.xlsx]

## Sheet: Sheet1
Figure 5 (H) & (I)
Susp + 1mM EDTA_48hr in sgPI3K cells
	1st
	sgNTC_DMSO			sgNTC_Lat.B			sgC2A_DMSO			sgC2A_Lat.B			sgC3_DMSO			sgC3_Lat.B
	Trypan blue	GUVac	Total	Trypan blue	GUVac	Total	Trypan blue	GUVac	Total	Trypan blue	GUVac	Total	Trypan blue	GUVac	Total	Trypan blue	GUVac	Total			Total n of cells
	21	0	37	17	20	47	21	0	34	41	1	64	40	0	64	23	0	52		NTC_DMSO	927
	19	1	38	11	21	44	18	0	25	38	0	44	43	0	55	17	0	36		NTC_Lat.B	1369
	28	0	46	10	19	37	19	0	26	29	0	38	22	0	33	23	0	37		C2a_DMSO	627
	21	1	28	16	15	35	26	0	33	26	0	30	16	0	25	32	0	51		C2a_Lat.B	883
	25	3	37	3	12	26	17	0	25	29	2	43	18	0	36	23	0	37		C3_DMSO	1026
	30	0	47	9	17	31	30	0	39	28	1	36	26	0	38	25	0	41		C3_Lat.B	885
	21	0	28	10	13	29	28	0	38	25	0	33	22	0	39
	20	0	33	11	12	33	25	0	38	22	2	28	26	0	41
				9	18	34	18	0	32	37	0	47	21	0	41
				20	18	48
sum	185	5	294	116	165	364	202	0	290	275	6	363	234	0	372	143	0	254
%	62.9252	1.70068		31.8681	45.3297		69.6552	0		75.7576	1.65289		62.9032	0		56.2992	0
	2nd
	sgNTC_DMSO			sgNTC_Lat.B			sgC2A_DMSO			sgC2A_Lat.B			sgC3_DMSO			sgC3_Lat.B
	Trypan blue	GUVac	Total	Trypan blue	GUVac	Total	Trypan blue	GUVac	Total	Trypan blue	GUVac	Total	Trypan blue	GUVac	Total	Trypan blue	GUVac	Total
	32	0	40	6	29	45	30	0	39	40	2	46	83	0	109	60	0	88
	33	2	46	18	23	51	20	0	35	39	1	49	57	0	80	45	0	71
	50	1	62	3	30	44	25	0	33	42	4	53	48	0	70	32	0	48
	49	0	57	6	26	38	17	0	22	29	0	37	46	0	61	38	0	53
	31	0	36	10	34	55	20	0	28	22	1	27				38	0	49
	16	2	32	11	33	50				43	1	52
	28	0	37	10	26	41
	31	1	41	10	22	37
				8	32	49
				11	37	51
				9	31	42
				9	31	46
				8	32	45
sum	270	6	351	119	386	594	112	0	157	215	9	264	234	0	320	213	0	309
%	76.9231	1.7094		20.0337	64.9832		71.3376	0		81.4394	3.40909		73.125	0		68.932	0
	3rd
	sgNTC_DMSO			sgNTC_Lat.B			sgC2A_DMSO			sgC2A_Lat.B			sgC3_DMSO			sgC3_Lat.B
	Trypan blue	GUVac	Total	Trypan blue	GUVac	Total	Trypan blue	GUVac	Total	Trypan blue	GUVac	Total	Trypan blue	GUVac	Total	Trypan blue	GUVac	Total
	38	1	62	13	50	70	15	0	24	43	2	55	51	0	66	29	0	45
	39	0	65	17	42	65	15	0	23	29	2	41	59	0	72	26	0	38
	22	0	31	13	52	75	17	0	24	34	0	43	46	0	63	38	0	55
	26	1	47	12	37	56	30	0	32	23	1	30	29	0	45	28	0	34
	21	0	32	9	34	48	34	0	43	37	0	50	36	0	46	25	0	38
	31	1	45	9	36	48	26	0	34	28	0	37	29	0	42	22	0	29
				9	32	49										29	0	40
																36	0	43
sum	177	3	282	82	283	411	137	0	180	194	5	256	250	0	334	233	0	322
%	62.766	1.06383		19.9513	68.8564		76.1111	0		75.7812	1.95312		74.8503	0		72.3602	0
