# Supplementary figures and images for: Formation of a giant unilocular vacuole via macropinocytosis-like process confers anoikis resistance
Source: eLife journal article supplement (doi:10.7554/elife.96178), 2024-04-16

Figure3 (D)

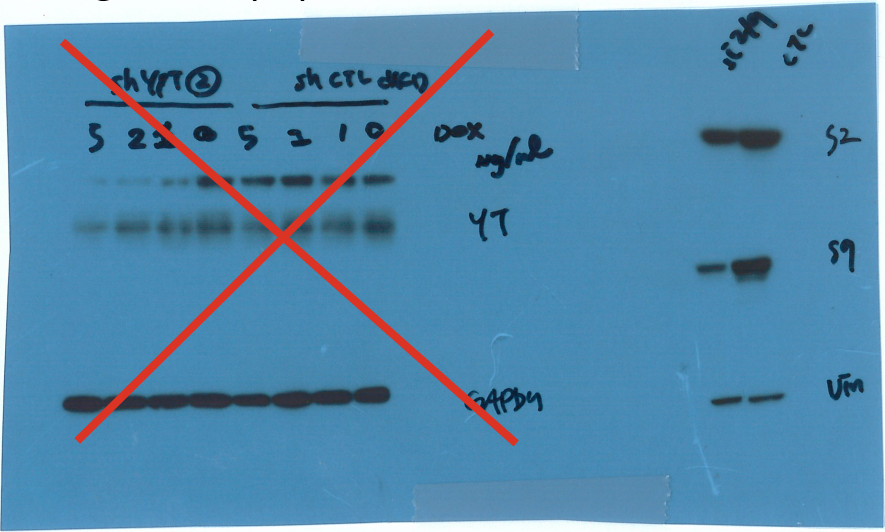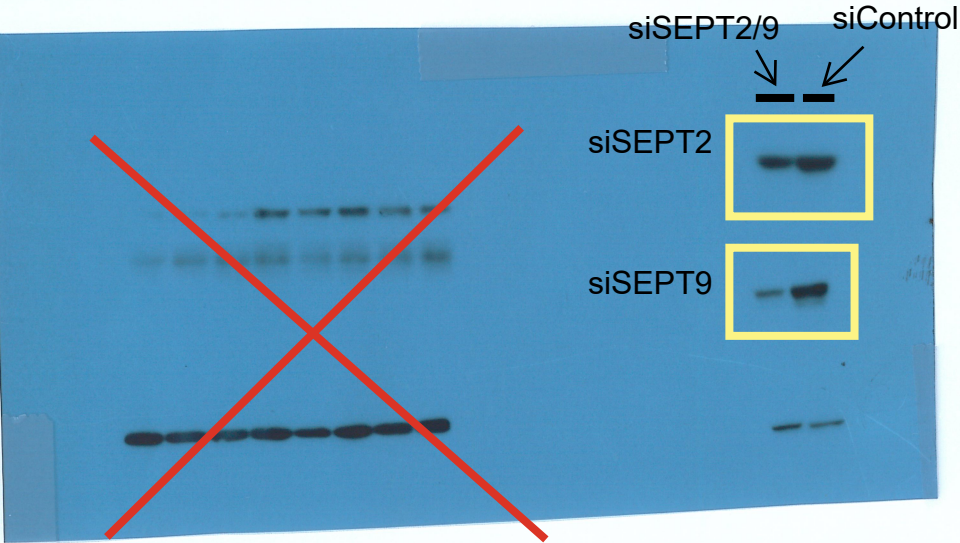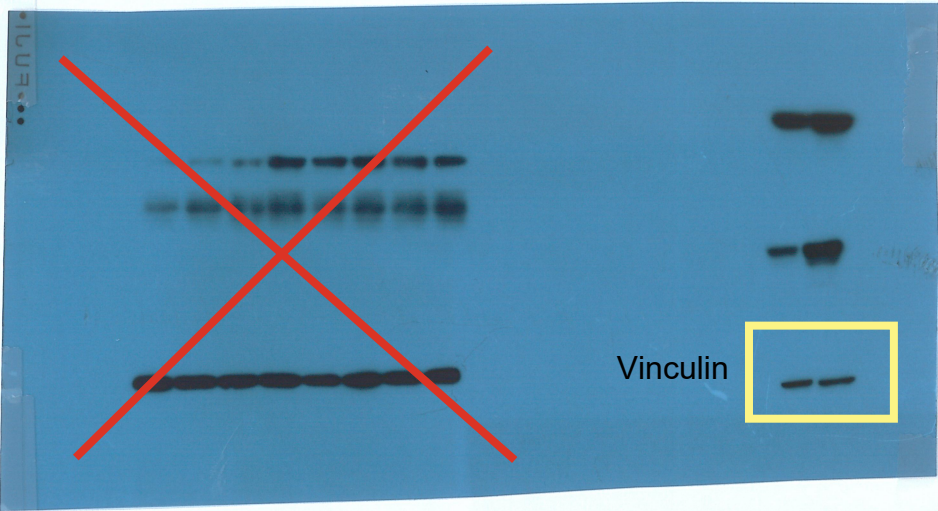

Supplement: fig3-data7 [file elife-96178-fig3-data7-v1.zip]

# Figure 4-figure supplement 1 (C)

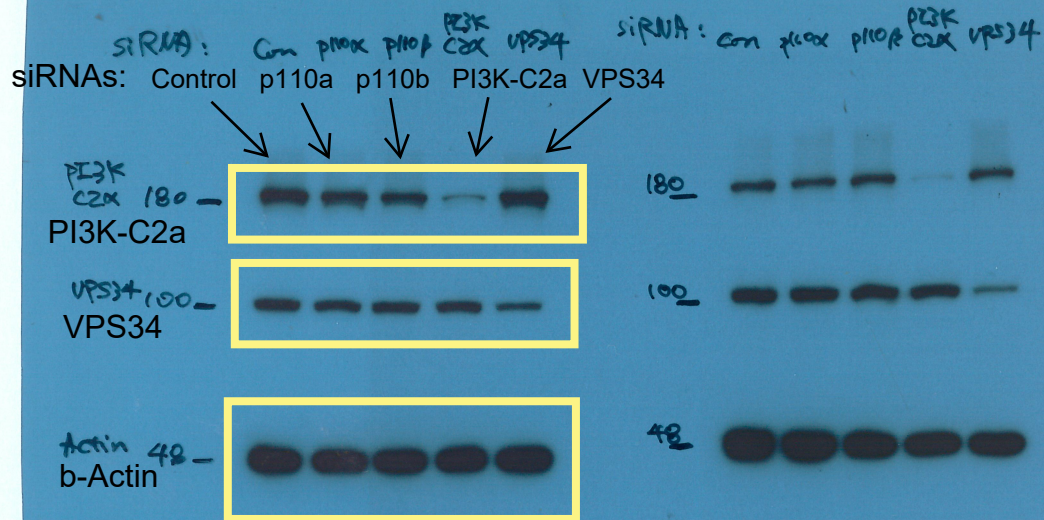

Supplement: fig4-figsupp1-data1 [file elife-96178-fig4-figsupp1-data1-v1.zip]

21.07.29

Figure 4-figure supplement 1 (D)

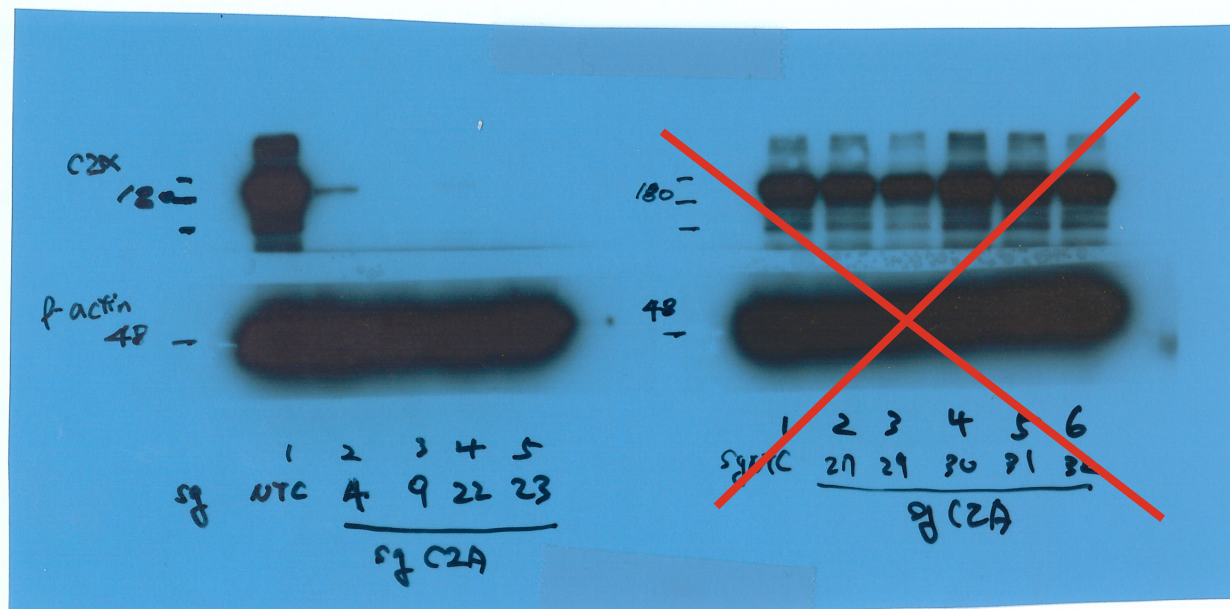

sgNTC sgPI3K-C2a

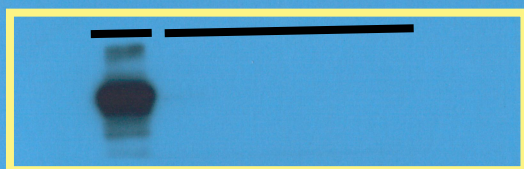

PI3K-C2a

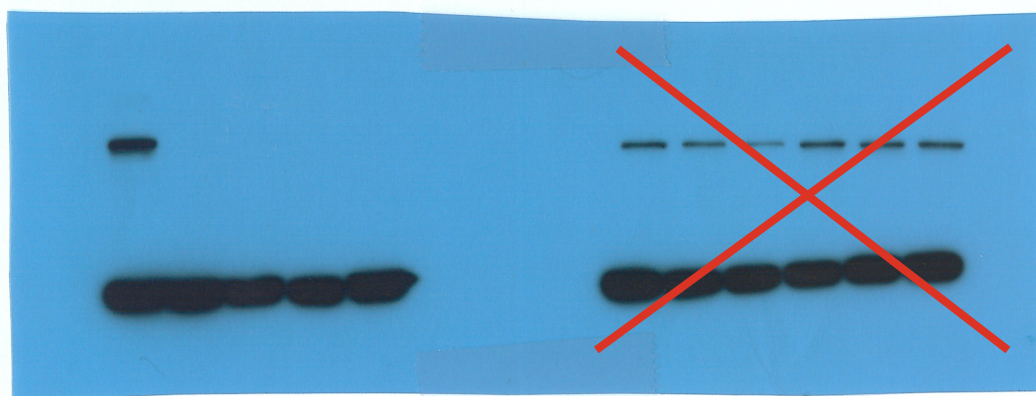

b-Actin

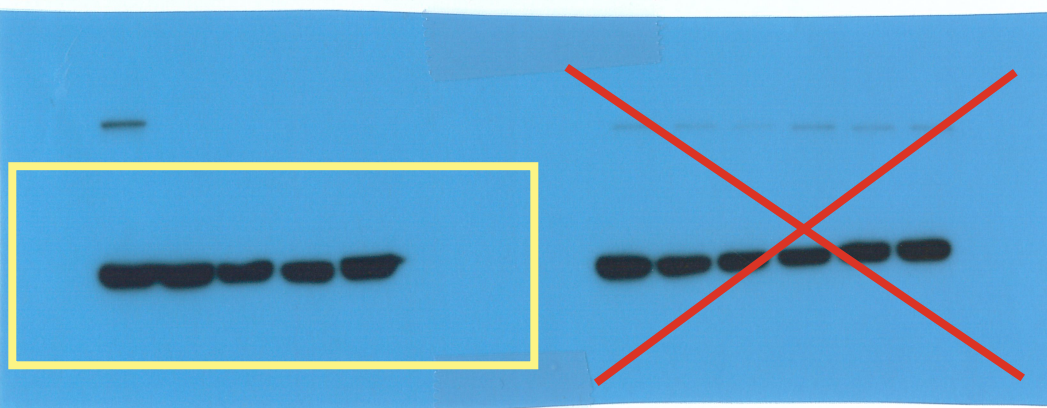

Supplement: fig4-figsupp1-data3 [file elife-96178-fig4-figsupp1-data3-v1.zip]

# Figure 4-figure supplement 1 (E)

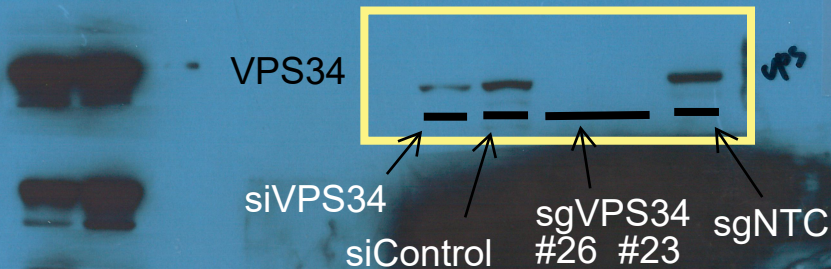

Figure 4-figure supplement 1 (E)

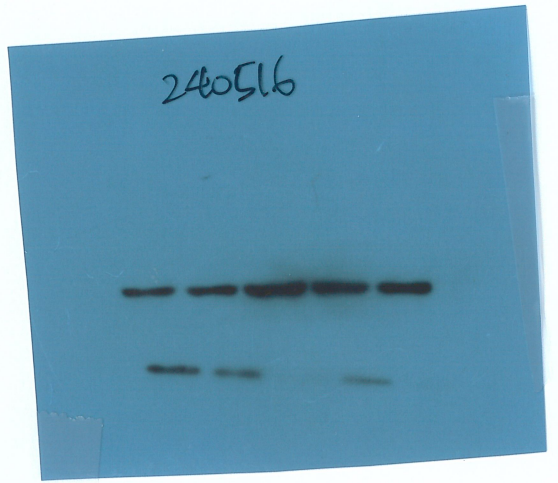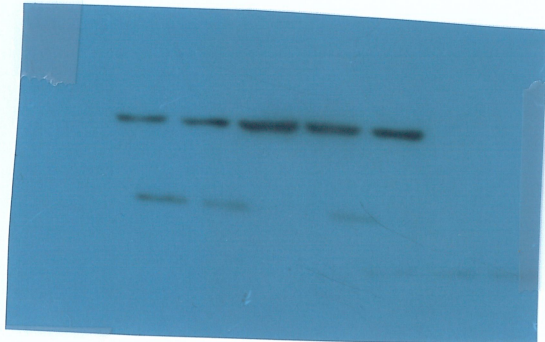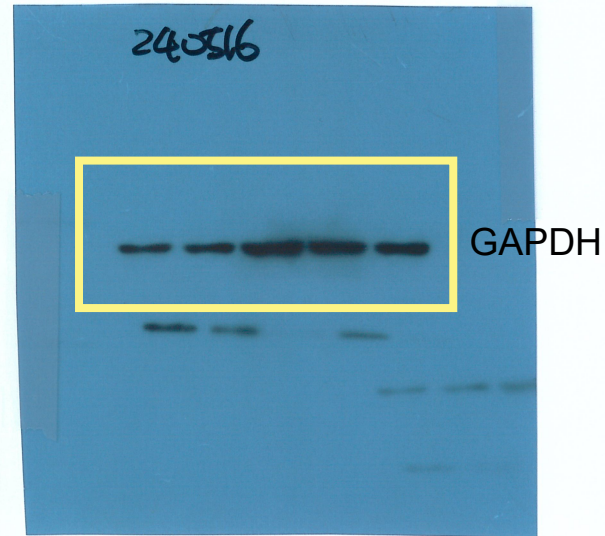

Supplement: fig4-figsupp1-data5 [file elife-96178-fig4-figsupp1-data5-v1.zip]
